# Supplementary material for: Porous Carbon Material Derived from Steam-Exploded Poplar for Supercapacitor: Insights into Synergistic Effect of KOH and Urea on the Structure and Electrochemical Properties
Source: MDPI journal article supplement (doi:10.3390/ma15082741), 2022-04-08
Supplement: s1 [file s1]

# Porous Carbon Material Derived from Steam-Exploded Poplar for Supercapacitor: Insights into Synergistic Effect of KOH and Urea on the Structure and Electrochemical Properties

Dayong Ding <sup>1,2,\*</sup>, Lan Ma <sup>1</sup>, Xin Li <sup>1</sup>, Zhong Liu <sup>1,\*</sup>, Lanfeng Hui <sup>1</sup>, Fengshan Zhang <sup>2,\*</sup> and Yumeng Zhao <sup>3</sup>

<sup>1</sup> School of light industry science and engineering, Tianjin University of Science and Technology, Tianjin 300457, China; 15631615922@sohu.com (L.M.); 934128141@mail.tust.edu.cn (X.L.); hlfeng@tust.edu.cn (L.H.)

<sup>2</sup> Laboratory of Comprehensive Utilization of Paper Waste, Shandong Huatai Paper Co Ltd., Dongying 257335, China

<sup>3</sup> National Engineering Laboratory for Pulp and Paper, China National Pulp and Paper Research Institute Co. Ltd., Beijing 100102, China; zhaoyumeng@cnpri.com

\* Correspondence: ddyong2019@tust.edu.cn (D.D.); mglz@tust.edu.cn (Z.L.); jszx@huatai.com (F.Z.)

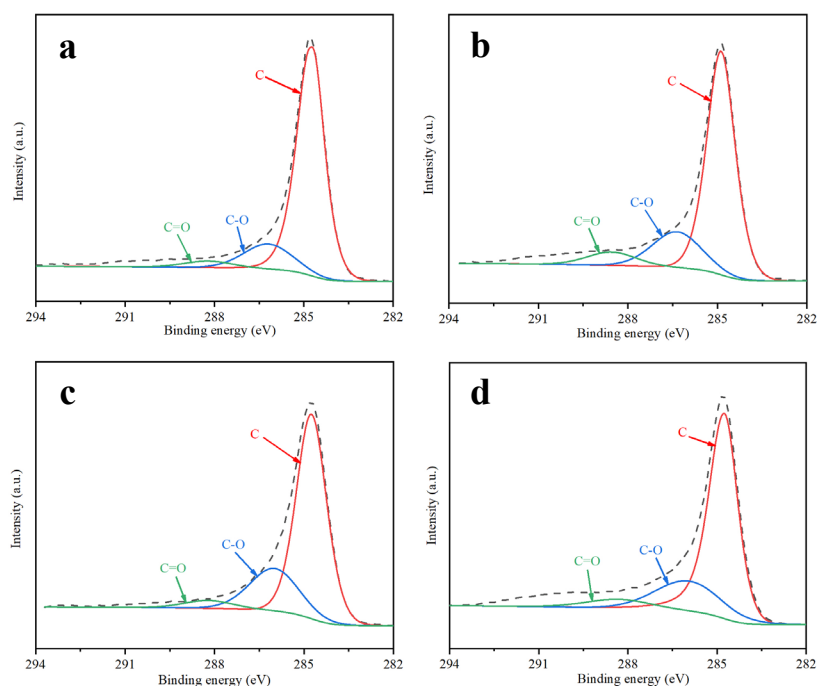

**Figure S1.** High-resolution C1 s spectra of PC800-1 (a), PC800-2 (b), PC800-3 (c), and PC800-4 (d).

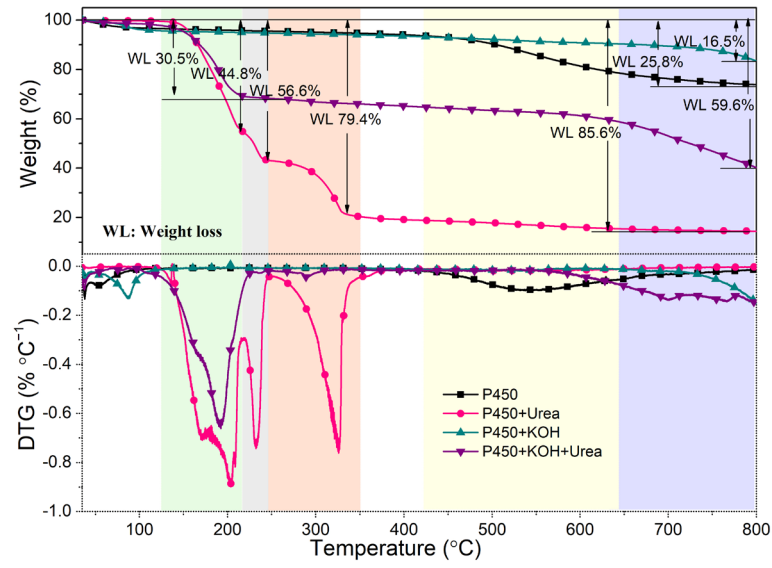

**Figure S2.** TG/DTG curves of pre-carbonization SEP under different conditions in a flow of nitrogen gas.

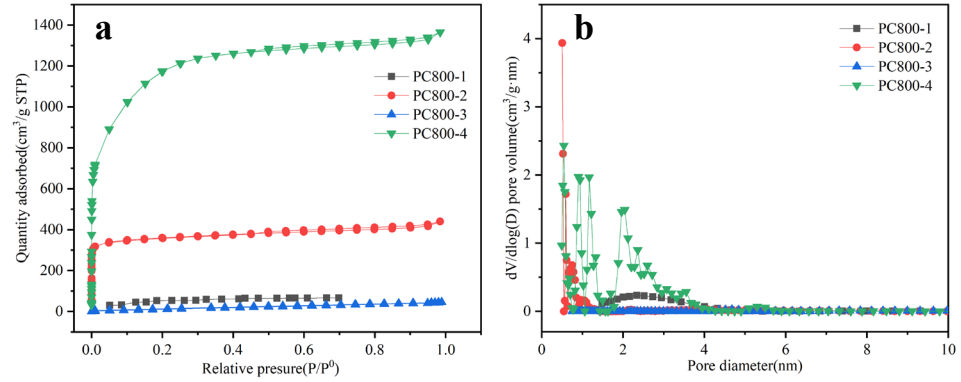

**Figure S3.** Nitrogen adsorption-desorption isotherms (a), Pore size distribution curves (b).

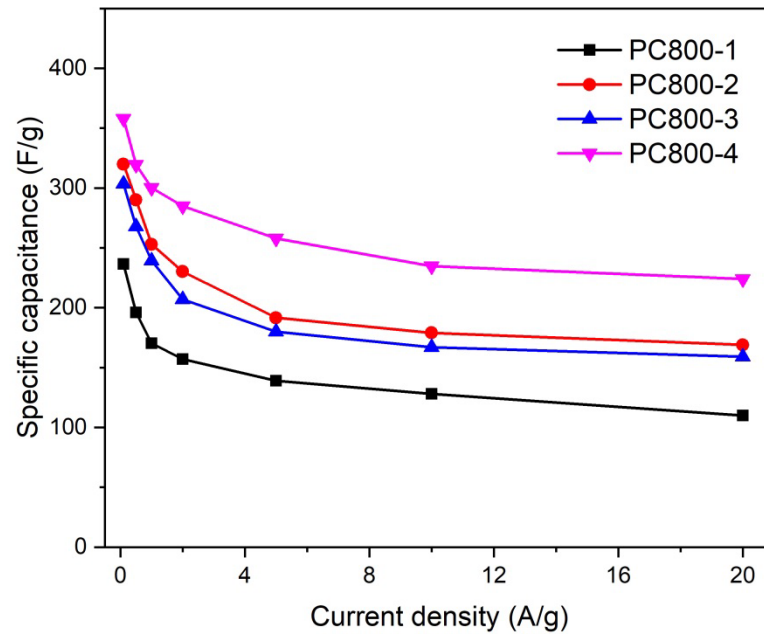

**Figure S4.** Specific capacitances of the PC800s at different current densities (0.1–20 A g<sup>-1</sup>).
